# Supplementary material for: Long-Term Land Use Affects Phosphorus Speciation and the Composition of Phosphorus Cycling Genes in Agricultural Soils
Source: PubMed Central journal article supplement (PMC6065304; doi:10.3389/fmicb.2018.01643), 2018-07-20
Supplement: Presentation_1.pdf [file Presentation_1.pdf]

## *Supplementary Material*

# **Long-term Land Use Affects Phosphorus Speciation and the Composition of Phosphorus Cycling Genes in Agricultural Soils**

**Jin Liu<sup>1,2</sup>, Barbara J. Cade-Menun<sup>3</sup>, Jianjun Yang<sup>4</sup>, Yongfeng Hu<sup>5</sup>, Corey W. Liu<sup>6</sup>, Julien Tremblay<sup>7</sup>, Kerry LaForge<sup>3</sup>, Michael Schellenberg<sup>3</sup>, Chantal Hamel<sup>3</sup>, Luke Bainard<sup>3\*</sup>**

<sup>1</sup>College of Agronomy and Biotechnology, China Agricultural University, Beijing, China

<sup>2</sup>Visiting Scientist, Agriculture and Agri-Food Canada, Swift Current Research and Development Centre, Swift Current, SK, Canada

<sup>3</sup>Swift Current Research and Development Centre, Agriculture and Agri-Food Canada, Swift Current, SK, Canada

<sup>4</sup>Institute of Environment and Sustainable Development in Agriculture, Chinese Academy of Agricultural Sciences, Beijing, China

<sup>5</sup>Canadian Light Source, University of Saskatchewan, Saskatoon, SK, Canada

<sup>6</sup>Stanford Magnetic Resonance Laboratory, Stanford University School of Medicine & ChEM-H-Stanford University, Stanford, CA, USA

<sup>7</sup>Energy, Mining and Environment, National Research Council of Canada, Montreal, QC, Canada

**\* Correspondence:**

Luke D. Bainard, Agriculture and Agri-Food Canada, Swift Current Research and Development Centre, Box 1030, Swift Current, SK, Canada; [luke.bainard@agr.gc.ca](mailto:luke.bainard@agr.gc.ca); telephone 306-770-4497.

## 1 Supplementary Figures and Tables

### 1.1 Supplementary Figures

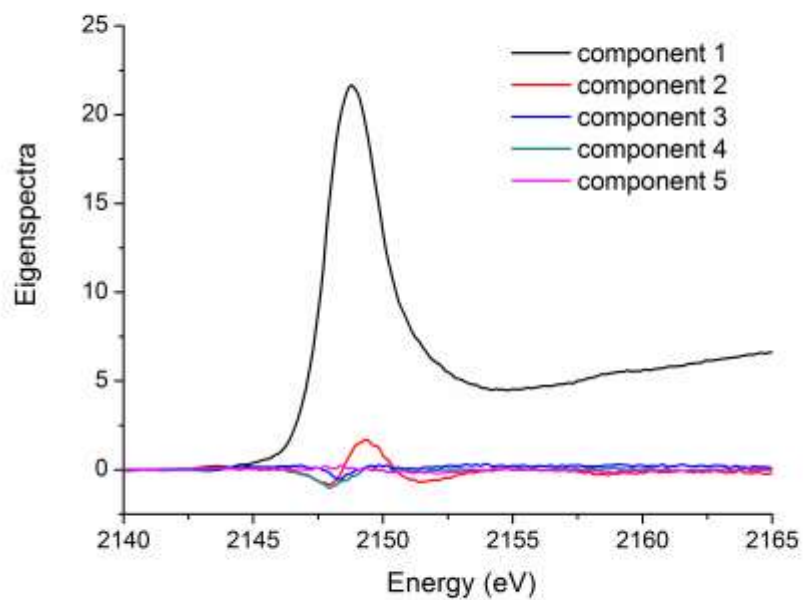

**Figure S1.** Eigenspectra of the first five components obtained from principal component analysis (PCA) on P K-edge XANES spectra of the studied soil samples.

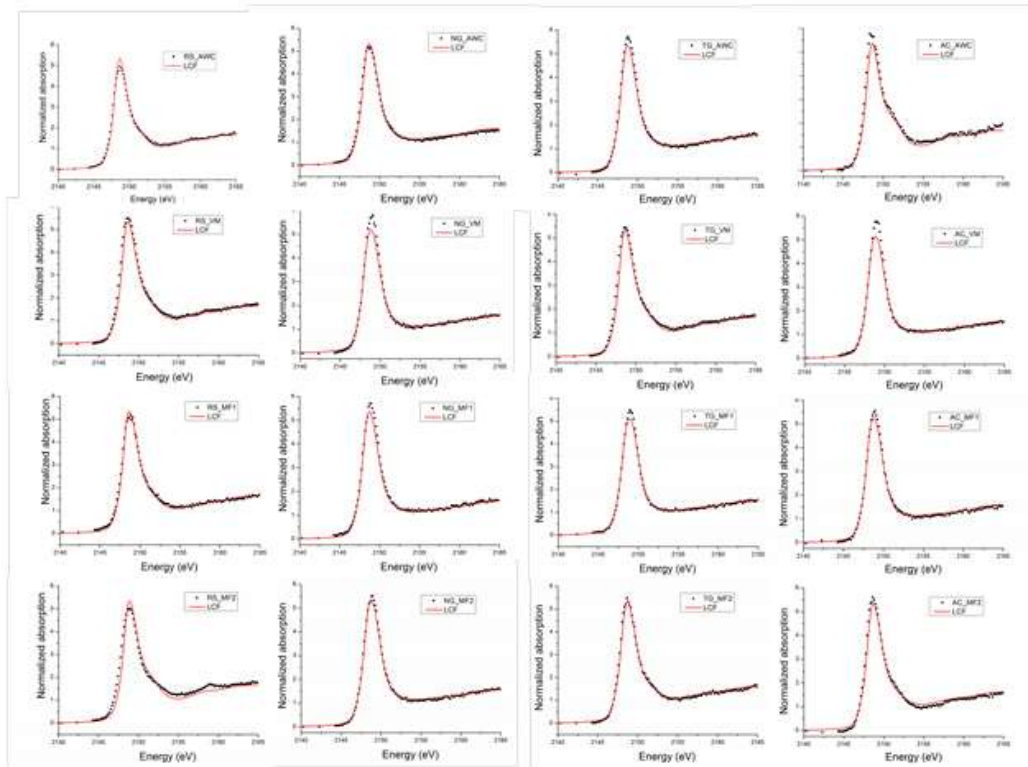

**Figure S2.** Linear combination fitting of P K-edge XANES spectra of the investigated soils collected at four locations of Val Marie (VM), Auvergne Wise Creek (AWC), Masfield1 (MF1) and Masfield2 (MF2) under different land uses including roadside soils (RS), native grasslands (NG), tame grasslands (TG) and annual croplands (AC).

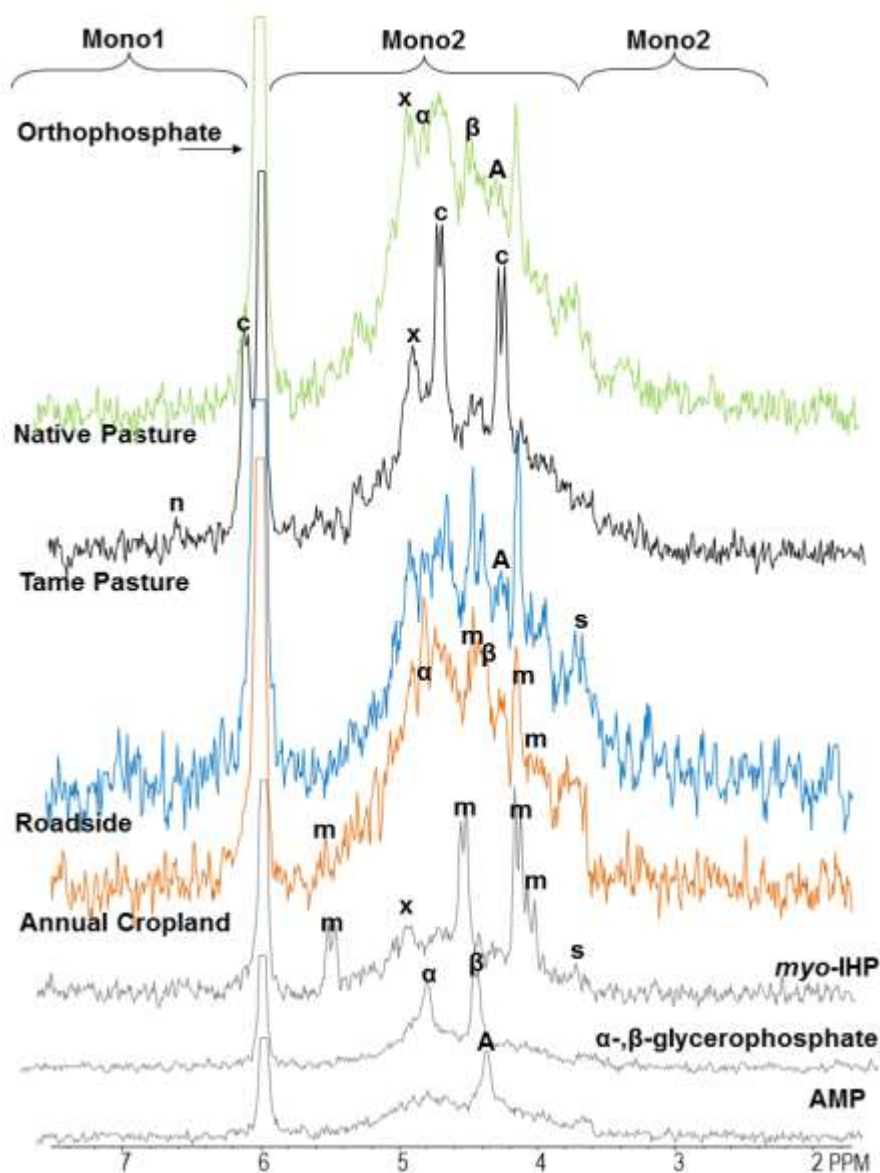

**Figure S3.** Spectra (P-NMR) zoomed in to show details of the orthophosphate monoester region. Spectra were processed with 2 Hz line-broadening, and are plotted to full height and scaled to the height of the tallest peak in the Mono2 region. Note that the orthophosphate peak is truncated. The colored spectra show the samples for each land use type from the Masfield 1 location; the grey spectra are samples from this project into which P forms, indicated for each spectrum, were added to help with peak identification. Mono1, Mono2, Mono3, general regions of the orthophosphate monoester region;  $\alpha$ ,  $\alpha$ -glycerophosphate;  $\beta$ ,  $\beta$ -glycerophosphate; A, adenosine monophosphate (AMP); c, *chiro*-inositol hexakisphosphate (IHP), 4 axial 2 equatorial conformation; m, *myo*-IHP; n, *neo*-IHP; s, *scyllo*-IHP; x, unknown P compound. Note that not all peaks in all spectra are labelled, even if the peaks are present.

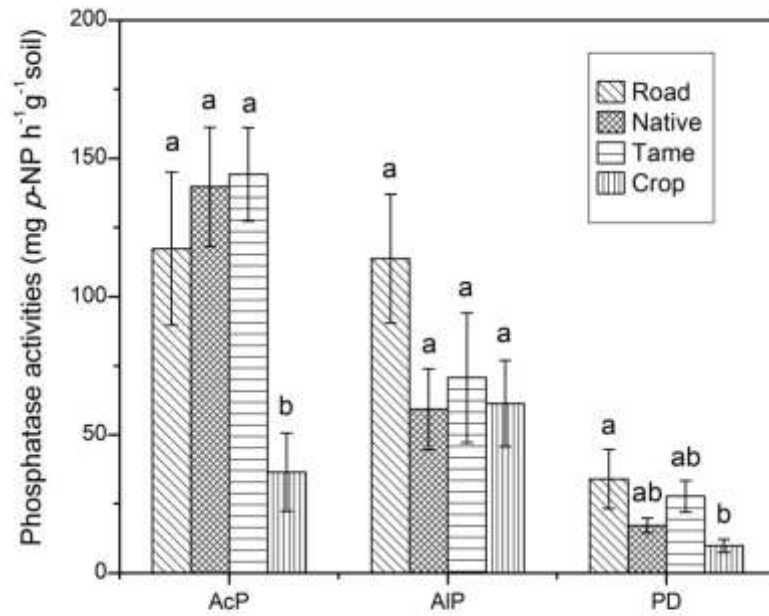

**Figure S4.** Phosphatase activities of the studied soils under different land use. AcP, acid phosphomonoesterase; AIP, alkaline phosphomonoesterase; PD, phosphodiesterase. Significant letters indicate significant differences in enzyme activities among land use types for each enzyme.

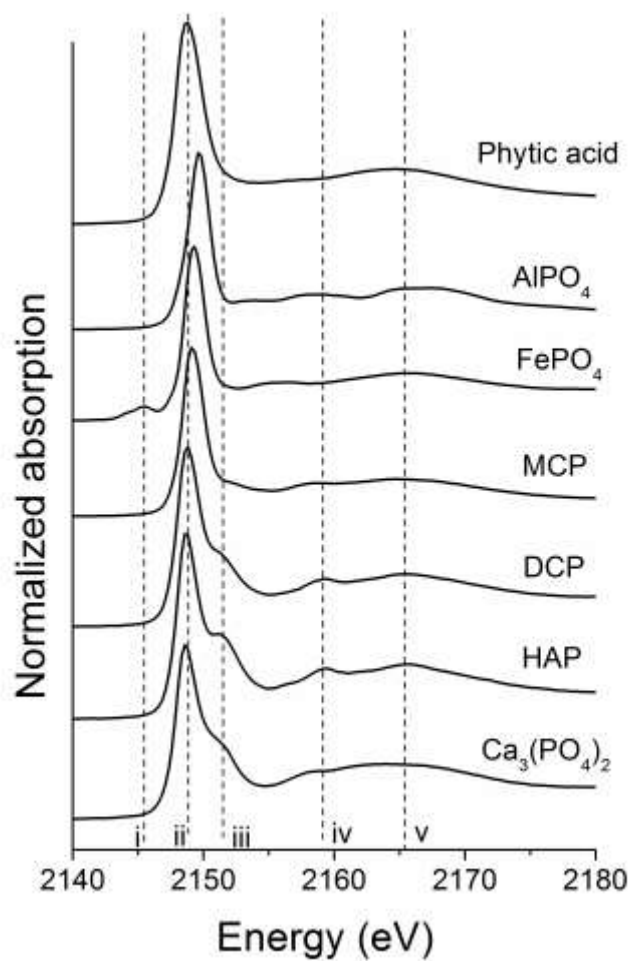

**Figure S5.** Phosphorus K-edge XANES spectra of P references. MCP,  $\text{Ca}(\text{H}_2\text{PO}_4)_2$ ; DCP,  $\text{CaHPO}_4$ ; HAP, hydroxyapatite.

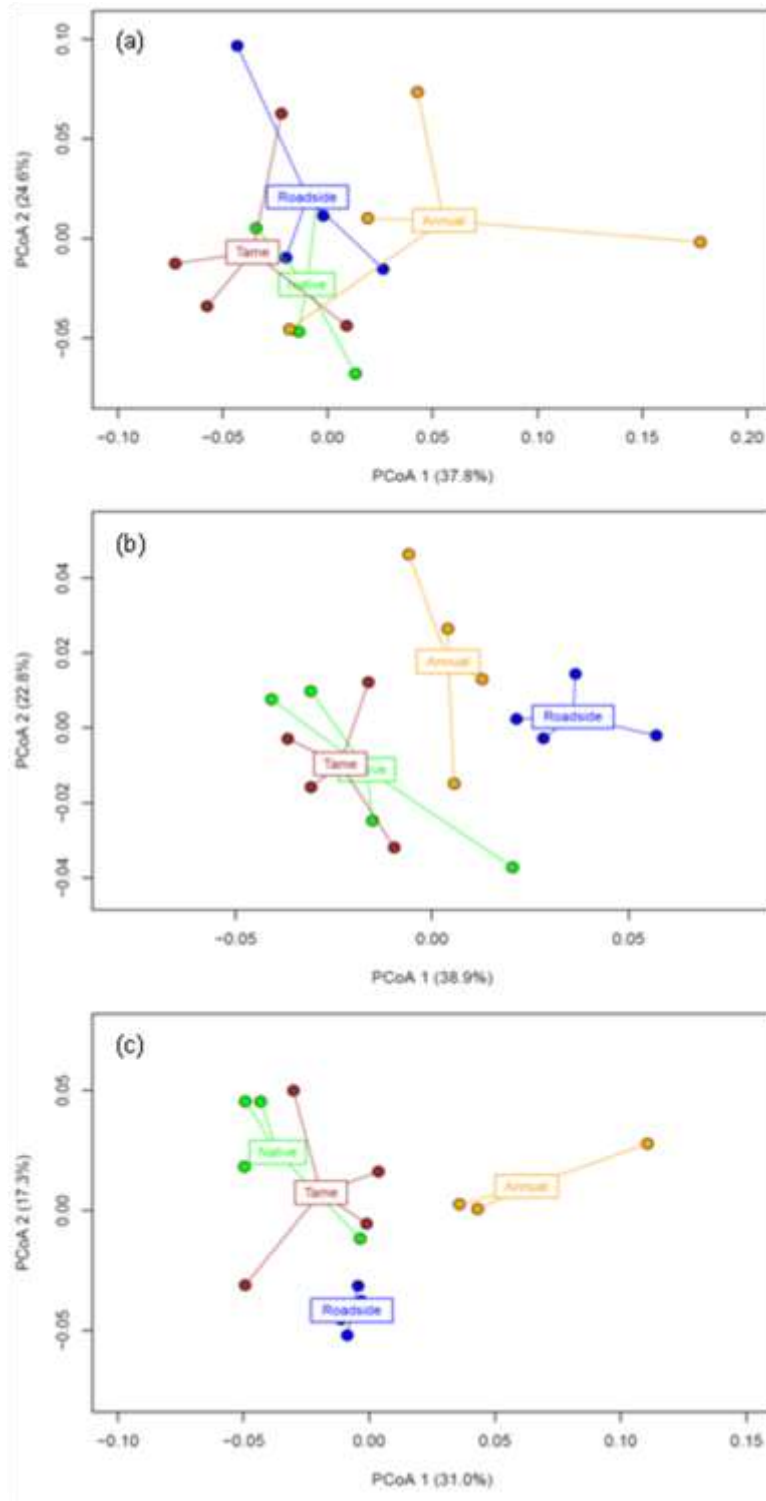

**Figure S6.** Composition of the soil (a) archaeal, (b) bacterial, and (c) fungal communities among the four land use types based on the metagenomic data sets and principle coordinate analysis (PCoA) of Bray-Curtis distances. Green, brown, blue and yellow colours respectively represent native grasslands, tame grasslands, roadsides, and annual croplands.

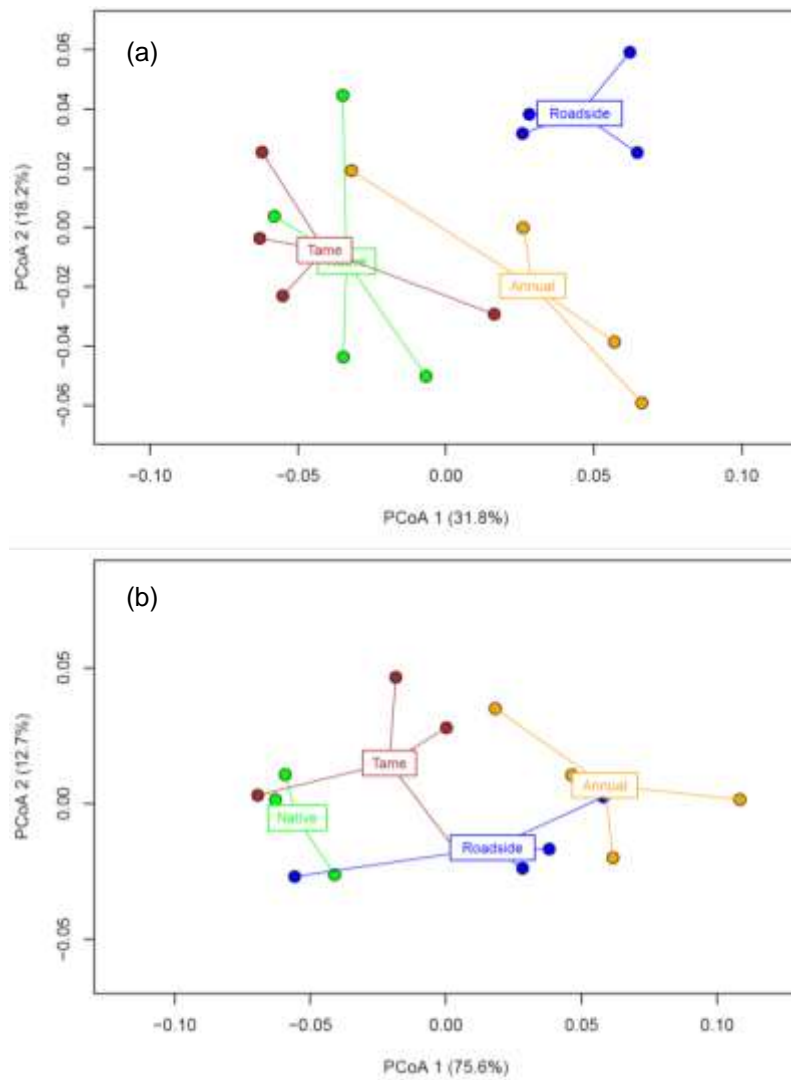

**Figure S7.** Composition of the (a) P cycling bacterial community and (b) P cycling functional genes among the four land use types based on the metagenomic data sets and principle coordinate analysis (PCoA) of Bray-Curtis distances. Green, brown, blue and yellow colours respectively represent native grasslands, tame grasslands, roadsides, and annual croplands.



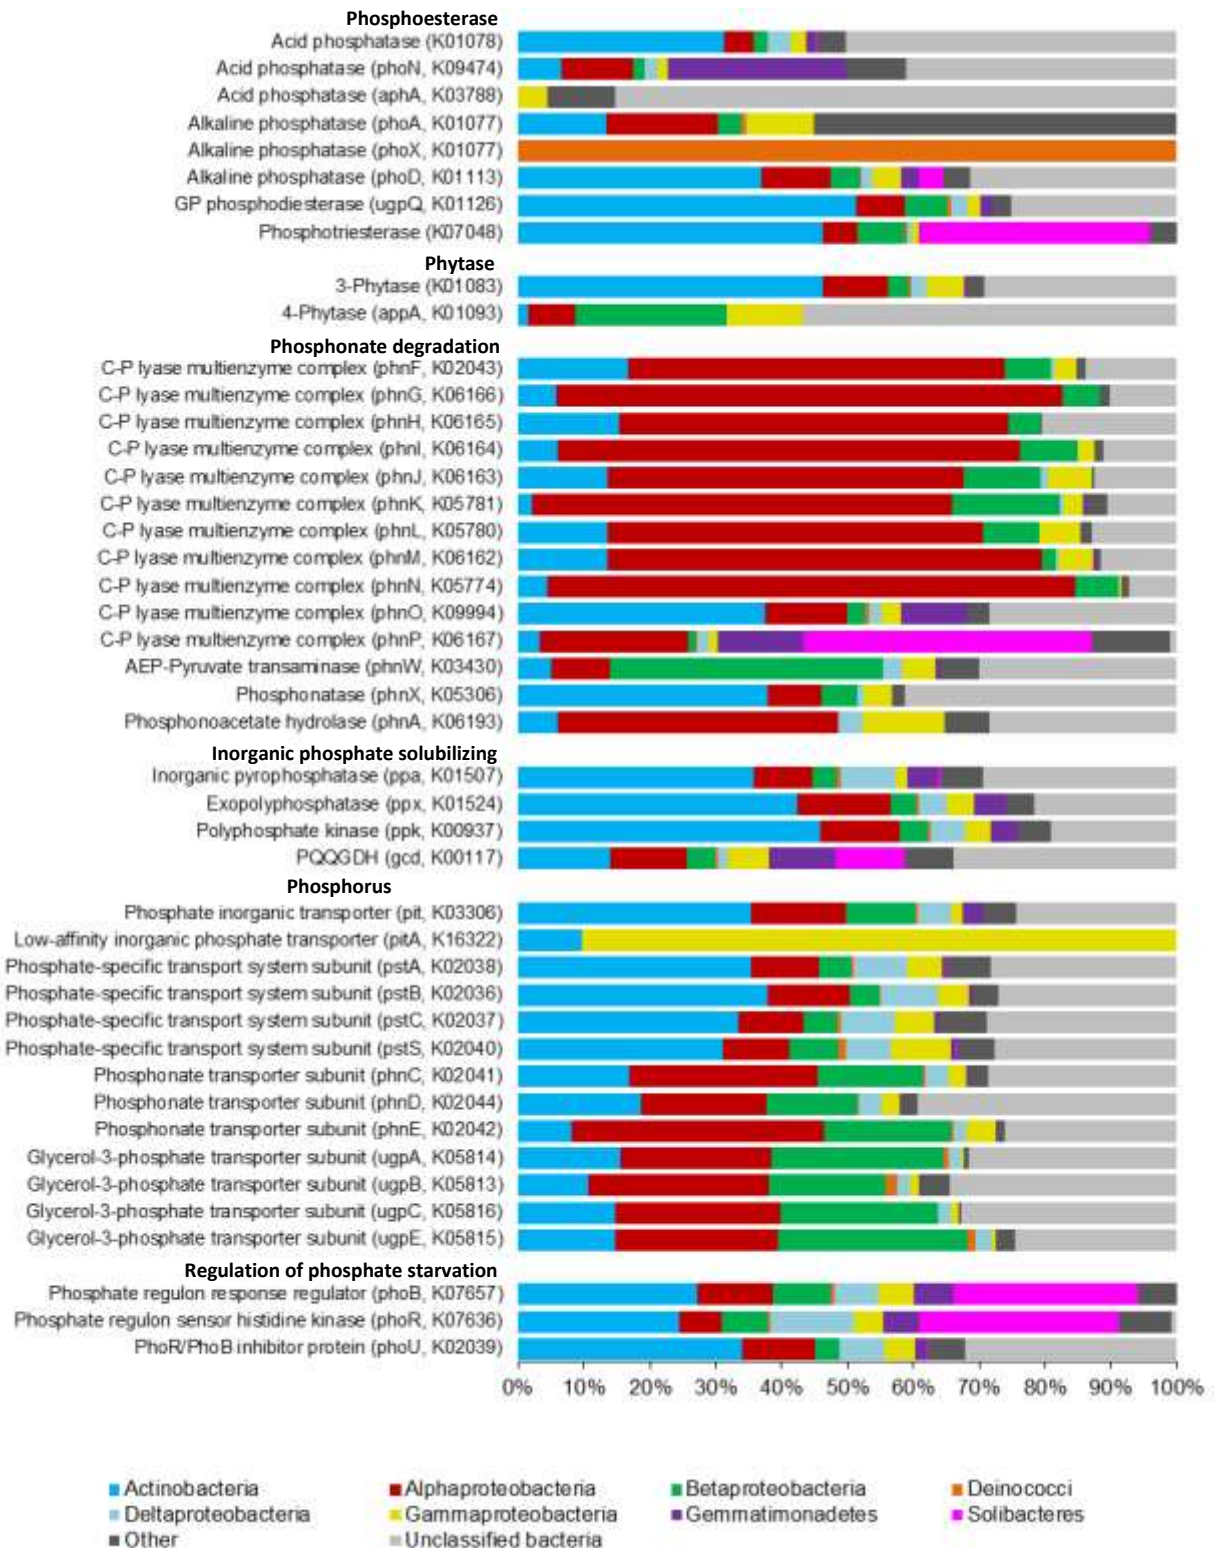

**Figure S8.** Taxonomic composition of phosphorus cycling functional genes based on the metagenomic data sets. Gene functions were assigned by matching predicted genes of the co-assembled metagenome against the KEGG genes database.

## 1.2 Supplementary Tables

**Table S1.** Results of the first five components obtained from principle component analysis (PCA) on P K-edge XANES spectra of the studied soil samples.

| Components  | Eigenvalue | Variation | Accumulated variation | IND    |
|-------------|------------|-----------|-----------------------|--------|
| Component 1 | 156.9      | 0.840     | 0.840                 | 0.0120 |
| Component 2 | 6.862      | 0.036     | 0.877                 | 0.0108 |
| Component 3 | 5.170      | 0.027     | 0.904                 | 0.0098 |
| Component 4 | 3.810      | 0.020     | 0.925                 | 0.0092 |
| Component 5 | 2.581      | 0.013     | 0.939                 | 0.0095 |

**Table S2.** Phosphorus K-edge XANES fitting results showing the relative percent of each phosphate species in the studied soil samples under different land uses.

| Land use          | location <sup>b</sup> | $\chi^2$ | R factor | Percentages of targeted components |     |     |     |     |                   |
|-------------------|-----------------------|----------|----------|------------------------------------|-----|-----|-----|-----|-------------------|
|                   |                       |          |          | %                                  |     |     |     |     |                   |
|                   |                       |          |          | IHP                                | TCP | DCP | MCP | HAP | FePO <sub>4</sub> |
| Roadsides         | AWC                   | 2.068    | 0.004    | 46                                 | 54  | -   |     |     |                   |
|                   | VM                    | 4.850    | 0.008    | 51                                 | 49  |     |     |     |                   |
|                   | MF1                   | 1.344    | 0.002    | 58                                 | 42  | -   |     |     |                   |
|                   | MF2                   | 8.131    | 0.014    | 43                                 | 45  | -   | -   | 12  |                   |
| Native grasslands | AWC                   | 1.747    | 0.003    | 100                                | -   | -   | -   | -   | -                 |
|                   | VM                    | 3.071    | 0.005    | 78                                 | -   | 12  | -   | -   | 10                |
|                   | MF1                   | 2.316    | 0.004    | 88                                 | -   | 12  | -   | -   | -                 |
|                   | MF2                   | 0.848    | 0.002    | 100                                | -   | -   | -   | -   | -                 |
| Tame grasslands   | AWC                   | 2.045    | 0.004    | 90                                 | -   | 10  | -   | -   | -                 |
|                   | VM                    | 4.421    | 0.007    | 88                                 | -   | -   | -   | 12  | -                 |
|                   | MF1                   | 1.085    | 0.002    | 79                                 | -   | -   | 10  | -   | 11                |
|                   | MF2                   | 1.348    | 0.003    | 72                                 | 11  | -   | -   | 17  |                   |
| Annual croplands  | AWC                   | 5.993    | 0.009    | 20                                 | 80  | -   |     |     |                   |
|                   | VM                    | 3.261    | 0.006    | 78                                 | -   | 10  | -   | -   | 12                |
|                   | MF1                   | 1.162    | 0.002    | 100                                | -   | -   | -   | -   | -                 |
|                   | MF2                   | 3.485    | 0.006    | 68                                 | 15  | -   | -   | 17  | -                 |

<sup>a</sup> IHP, inositol hexakisphosphate; TCP, tricalcium phosphate; DCP, dibasic calcium phosphate; MCP, calcium phosphate monobasic; HAP, hydroxyapatite

<sup>b</sup> four locations including Val Marie (VM), Auvergne Wise Creek (AWC), , Masefield1 (MF1) and Masefield2 (MF2).

**Table S3. Read count summaries and mapping statistics**

| Land use         | Location | Raw         | Surviving  | Surviving  | Surviving | Total Reads | Mapped     | Mapped% | Properly   | Properly |
|------------------|----------|-------------|------------|------------|-----------|-------------|------------|---------|------------|----------|
|                  |          | Fragments   | Fragments  | Fragments% | Single    | QCed        |            |         | Paired     | Paired%  |
| Annual cropland  | AWC      | 51,310,853  | 49,262,611 | 96%        | 1,669,388 | 98,518,012  | 66,726,659 | 67%     | 49,529,234 | 50%      |
| Tame grassland   | AWC      | 46,355,362  | 44,191,424 | 95%        | 1,796,591 | 88,373,630  | 63,590,571 | 71%     | 46,422,046 | 52%      |
| Native grassland | AWC      | 36,797,199  | 35,215,433 | 95%        | 1,278,149 | 70,422,390  | 48,913,068 | 69%     | 36,473,824 | 51%      |
| Roadside         | AWC      | 63,139,252  | 60,266,333 | 95%        | 2,466,359 | 120,528,294 | 77,642,280 | 64%     | 56,779,294 | 47%      |
| Annual cropland  | MF1      | 59,445,678  | 57,446,871 | 96%        | 1,612,013 | 114,890,574 | 77,183,890 | 67%     | 58,102,852 | 50%      |
| Tame grassland   | MF1      | 48,145,693  | 45,895,219 | 95%        | 1,894,269 | 91,783,844  | 58,517,926 | 63%     | 43,406,616 | 47%      |
| Native grassland | MF1      | 39,124,209  | 37,620,062 | 96%        | 1,199,183 | 75,232,162  | 52,344,434 | 69%     | 39,152,028 | 52%      |
| Roadside         | MF1      | 52,895,185  | 50,856,159 | 96%        | 1,657,408 | 101,703,394 | 65,356,276 | 64%     | 48,097,478 | 47%      |
| Annual cropland  | MF2      | 62,255,615  | 59,976,986 | 96%        | 1,791,252 | 119,943,414 | 80,797,617 | 67%     | 60,906,162 | 50%      |
| Tame grassland   | MF2      | 36,884,307  | 35,640,735 | 96%        | 1,019,928 | 71,277,706  | 50,735,826 | 71%     | 37,323,674 | 52%      |
| Native grassland | MF2      | 38,000,832  | 36,713,862 | 96%        | 1,051,290 | 73,422,692  | 51,901,604 | 70%     | 38,541,106 | 52%      |
| Roadside         | MF2      | 38,723,748  | 36,453,806 | 94%        | 1,957,838 | 72,900,776  | 46,276,101 | 63%     | 34,530,348 | 47%      |
| Annual cropland  | VM       | 52,370,549  | 50,326,666 | 96%        | 1,644,656 | 100,645,130 | 66,962,572 | 66%     | 51,231,132 | 50%      |
| Tame grassland   | VM       | 42,928,758  | 41,665,263 | 97%        | 975,600   | 83,322,894  | 58,604,855 | 70%     | 43,775,838 | 52%      |
| Native grassland | VM       | 37,423,654  | 35,833,575 | 95%        | 1,267,091 | 71,658,448  | 43,916,950 | 61%     | 32,503,230 | 45%      |
| Roadside         | VM       | 52,019,703  | 49,778,670 | 95%        | 1,851,108 | 99,544,846  | 63,011,239 | 63%     | 47,616,400 | 47%      |
| Total fragments  |          | 909,483,858 |            |            |           |             |            |         |            |          |
| Total reads      |          | 1818967716  |            |            |           |             |            |         |            |          |
| Total bases      |          | 2.72845E+11 |            |            |           |             |            |         |            |          |
| Total bases (Gb) |          | 272.8451574 |            |            |           |             |            |         |            |          |

**Table S4. Assembly statistics**

| <b>Assembly stats</b>                                                                                      | <b>Value</b>  |
|------------------------------------------------------------------------------------------------------------|---------------|
| contigs greater than 0.5kb                                                                                 | 9,235,997     |
| contigs greater than 1kb                                                                                   | 1,815,803     |
| contigs greater than 2kb                                                                                   | 327,119       |
| contigs greater than 5kb                                                                                   | 29,580        |
| contigs greater than 10kb                                                                                  | 3,675         |
| contigs greater than 20kb                                                                                  | 292           |
| contigs greater than 40kb                                                                                  | 17            |
| contigs greater than 80kb                                                                                  | 1             |
| contigs greater than 160kb                                                                                 | 0             |
| contigs greater than 320kb                                                                                 | 0             |
| contigs greater than 640kb                                                                                 | 0             |
| contigs greater than 1Mb                                                                                   | 0             |
| contigs greater than 2Mb                                                                                   | 0             |
| contigs greater than 4Mb                                                                                   | 0             |
| contigs greater than 6Mb                                                                                   | 0             |
| contigs greater than 8Mb                                                                                   | 0             |
| contigs greater than 10Mb                                                                                  | 0             |
| Total contigs                                                                                              | 9,235,997     |
| Total bases in contigs (bp)                                                                                | 7,905,564,407 |
| Minimum contigs length (bp)                                                                                | 500           |
| Maximum contigs length (bp)                                                                                | 83,187        |
| GC content (%)                                                                                             | 64.91         |
| N25 - 25% of total sequence length is contained in the 184,805 sequence(s) having a length $\geq$ 1,322 bp |               |
| N50 - 50% of total sequence length is contained in the 517,365 sequence(s) having a length $\geq$ 826 bp   |               |
| N75 - 75% of total sequence length is contained in the 950,657 sequence(s) having a length $\geq$ 620 bp   |               |
| N90 - 90% of total sequence length is contained in the 1,251,656 sequence(s) having a length $\geq$ 543 bp |               |

**Table S5.** Chemical shifts of peaks detected in  $^{31}\text{P}$ -NMR spectra. Peaks were present in at least six of the 16 analyzed samples.

| P Form or Compound Class         | Chemical Shift (ppm)                                                                                                                                                                                                       |
|----------------------------------|----------------------------------------------------------------------------------------------------------------------------------------------------------------------------------------------------------------------------|
| <b>Inorganic P</b>               |                                                                                                                                                                                                                            |
| Orthophosphate                   | $6.00 \pm 0.00$                                                                                                                                                                                                            |
| Pyrophosphate                    | $-4.13 \pm 0.05$                                                                                                                                                                                                           |
| Polyphosphates                   | $-4.01 \pm 0.02, -4.86 \pm 0.50, -6.43 \pm 0.87, -8.90 \pm 0.52, -11.17 \pm 0.58, -12.89 \pm 0.62, -14.52 \pm 0.79, -16.09 \pm 0.57, -19.31 \pm 0.55, -20.88 \pm 0.78, -22.75 \pm 0.72, -25.53 \pm 0.68, -28.82 \pm 1.23,$ |
| <b>Organic P</b>                 |                                                                                                                                                                                                                            |
| Phosphonates                     | $29.87 \pm 0.47, 28.53 \pm 0.87, 26.04 \pm 0.85, 23.48 \pm 0.77, 20.95 \pm 0.86, 19.10 \pm 0.51, 17.24 \pm 0.38, 15.75 \pm 0.72, 14.11 \pm 0.73, 10.93 \pm 0.99, 7.23 \pm 0.18$                                            |
| <b>Orthophosphate Monoesters</b> |                                                                                                                                                                                                                            |
| <i>myo</i> - IHP                 | $5.54 \pm 0.02, 4.57 \pm 0.02, 4.11 \pm 0.03, 4.05 \pm 0.03$                                                                                                                                                               |
| <i>scyllo</i> - IHP              | $3.74 \pm 0.03$                                                                                                                                                                                                            |
| <i>neo</i> - IHP 4e/2a           | $6.36 \pm 0.03, 4.24 \pm 0.02$                                                                                                                                                                                             |
| <i>D-chiro</i> -IHP 4e/2a        | $6.54 \pm 0.05, 5.34 \pm 0.02, 3.99 \pm 0.03$                                                                                                                                                                              |
| <i>D-chiro</i> -IHP 4a/2e        | $6.14 \pm 0.02, 4.74 \pm 0.02, 4.34 \pm 0.03$                                                                                                                                                                              |
| Choline phosphate                | $3.86 \pm 0.04$                                                                                                                                                                                                            |
| Glucose 6-phosphate              | $5.25 \pm 0.01$                                                                                                                                                                                                            |
| Glucose 1-phosphate              | $3.35 \pm 0.02$                                                                                                                                                                                                            |
| Unknown                          | $4.92 \pm 0.04$                                                                                                                                                                                                            |
| Mono 1                           | $6.81 \pm 0.07, 6.70 \pm 0.05, 6.44 \pm 0.04, 6.25 \pm 0.03$                                                                                                                                                               |
| Mono 2                           | $5.85 \pm 0.03, 5.70 \pm 0.06, 5.58 \pm 0.05, 5.42 \pm 0.06, 5.23 \pm 0.08, 4.75 \pm 0.05, 4.65 \pm 0.03$                                                                                                                  |
| Mono 3                           | $3.65 \pm 0.03, 3.54 \pm 0.03, 3.44 \pm 0.03, 3.26 \pm 0.06, 3.11 \pm 0.07, 2.94 \pm 0.11, 2.70 \pm 0.04$                                                                                                                  |
| <b>Orthophosphate Diesters</b>   |                                                                                                                                                                                                                            |
| Other Diester 1                  | $2.32 \pm 0.12, 1.99 \pm 0.11, 1.52 \pm 0.17, 1.23 \pm 0.26, 0.88 \pm 0.24, 0.47 \pm 0.19, 0.21 \pm 0.12, -0.15 \pm 0.18, -0.45 \pm 0.12$                                                                                  |
| DNA                              | $-0.74 \pm 0.05, -0.89 \pm 0.06$                                                                                                                                                                                           |
| Other Diester 2                  | $-1.19 \pm 0.10, -1.59 \pm 0.22, -1.98 \pm 0.18, -2.60 \pm 0.35, -3.18 \pm 0.17, -3.59 \pm 0.20$                                                                                                                           |
| $\alpha$ -glycerophosphate       | $4.84 \pm 0.02$                                                                                                                                                                                                            |
| $\beta$ -glycerophosphate        | $4.52 \pm 0.01$                                                                                                                                                                                                            |
| Mononucleotides                  | $4.47 \pm 0.02, 4.42 \pm 0.02, 4.36 \pm 0.04, 4.26 \pm 0.03, 4.15 \pm 0.02$                                                                                                                                                |

Phosphorus forms: IHP, inositol hexaphosphates; *myo*-, *scyllo*-, *neo*-, *chiro*-IHP, stereoisomers of IHP; Mono1, Mono2, Mono3, peaks not specifically identified in three regions of the orthophosphate monoesters; OthDi1, OthDi2, peaks not specifically identified in the orthophosphate diester region.. 4e/2a, 4 equatorial, 2 axial configuration; 4a/2e, 4 axial, 2 equatorial configuration. Unknown, a peak that was identified in spectra, but not specifically identified with respect to P form; the chemical shift is consistent with the 4a/2e configuration of *neo*- IHP, but this identification could not be confirmed with spiking.

**Table S6.** Phosphorus forms<sup>a</sup> determined by <sup>31</sup>P Nuclear Magnetic Resonance for the studied soil samples under different land uses (means ± standard errors, n=4)<sup>b</sup>.

| Land uses        | OrthoP      | Pyro      | Poly      | Phos      | myo-IHP   | scy-IHP   | neo-IHP   | chiro-IHP1 | chiro-IHP2 | 4.9ppm     | α-glyc    | β-glyc    |
|------------------|-------------|-----------|-----------|-----------|-----------|-----------|-----------|------------|------------|------------|-----------|-----------|
|                  |             |           |           |           |           | %         |           |            |            |            |           |           |
| Roadside         | 43.1±6.0 a  | 1.0±0.2 a | 2.2±0.5 a | 1.4±0.3 a | 4.1±0.4 a | 2.8±0.4 a | 0.7±0 ab  | 1.5±0.3 a  | 1.8±0.2 a  | 2.9±0.5 b  | 1.1±0.2 a | 2.3±0.3 a |
| Native grassland | 27.8±2.4 b  | 1.3±0.4 a | 2.4±0.1 a | 1.6±0.2 a | 4.1±0.4 a | 2.6±0.2 a | 1.1±0.2 a | 2.0±0.1 a  | 3.9±1.0 a  | 4.6±1.0 ab | 1.5±0 a   | 2.4±0.2 a |
| Tame grassland   | 27.8±2.9 b  | 0.7±0.1 a | 2.4±0.1 a | 1.8±0.4 a | 4.2±0.4 a | 2.9±0.4 a | 0.7±0 ab  | 2.1±0.2 a  | 7.3±5.0 a  | 7.6±1.0 a  | 1.3±0.4 a | 2.5±0.6 a |
| Annual Crop      | 38.4±1.9 ab | 0.7±0.3 a | 2.2±0.4 a | 1.3±0.2 a | 4.7±0.6 a | 2.6±0.3 a | 0.6±0.2 b | 2.0±0.3 a  | 2.9±0.5 a  | 3.9±1.2 b  | 1.4±0.2 a | 2.6±0.4 a |

| Land uses        | Nucl       | Pchol     | G1P       | G6P      | Mono1     | Mono2      | Mono3     | DNA       | OthDi1    | OthDi2    |
|------------------|------------|-----------|-----------|----------|-----------|------------|-----------|-----------|-----------|-----------|
|                  |            |           |           |          |           | %          |           |           |           |           |
| Roadside         | 12.3±1.4 a | 1.4±0 a   | 0.7±0 a   | 0.7±0 a  | 0.7±0 a   | 12.0±2.0 a | 3.3±0.9 a | 0.8±0.3 a | 2.1±1.4 a | 0.8±0.2 a |
| Native grassland | 16.1±1.3 a | 1.5±0 a   | 0.7±0 a   | 1.0±0.2a | 0.9±0.2 a | 16.0±1.1 a | 4.3±1.1 a | 1.0±0.4 a | 2.2±0.5 a | 0.6±0.1 a |
| Tame grassland   | 14.3±1.6 a | 1.5±0 a   | 0.7±0 a   | 0.7±0 a  | 1.3±0.2 a | 14.8±1.9 a | 2.7±0.4 a | 0.6±0.1 a | 1.3±0.3 a | 0.6±0.1 a |
| Annual Crop      | 13.3±0.7 a | 1.4±0.2 a | 0.6±0.2 a | 0.8±0 a  | 1.2±0.3 a | 11.9±0.6 a | 3.3±0.8 a | 0.8±0 a   | 2.7±0.7 a | 0.6±0.1 a |

<sup>a</sup> orthophosphate (OrthP), pyrophosphate (Pyro), polyphosphate (Poly), phosphonates (Phos), *myo*-inositol hexakisphosphate (myo-IHP), *scyllo*-inositol hexakisphosphate (Scy-IHP), *neo*-inositol hexakisphosphate (neo-IHP), *chiro*-inositol hexakisphosphate 4e/2a (Chiro-IHP1), *chiro*-inositol hexakisphosphate 2e/4a (Chiro-IHP2), a and b glycerophosphate (a-glyc and b-glyc, respectively), mononucleotides (Nucl), choline phosphate (Pchol), glucose 1-phosphate (G1P), glucose 6-phosphate (G6P), orthophosphate monoesters, regions 1, 2, and 3 (Mono1, Mono2, and Mono3, respectively), deoxyribonucleic acid (DNA), and orthophosphate diesters, regions 1 and 2 (OthDi1 and OthDi2, respectively).

<sup>b</sup> Values in each column followed by the same lowercase letters are not significantly different according to LSD ( $P < 0.05$ )

**Table S7.** Effect of land use type on the composition of the soil microbial community and phosphorus (P) cycling related functional genes based on permanova (adonis function).

|                               | Factor        | Pr (>F) | r <sup>2</sup> |
|-------------------------------|---------------|---------|----------------|
| Archaeal community            | Land use type | 0.31    |                |
| Bacterial community           | Land use type | <0.0001 | 0.57           |
| Fungal community              | Land use type | <0.0001 | 0.54           |
| P cycling bacterial community | Land use type | <0.0001 | 0.50           |
| P cycling functional genes    | Land use type | 0.0017  | 0.57           |
